# Supplementary material for: Down-Regulation of Phosphoenolpyruvate Carboxylase Kinase in Grapevine Cell Cultures and Leaves Is Linked to Enhanced Resveratrol Biosynthesis
Source: MDPI journal article supplement (doi:10.3390/biom11111641), 2021-11-05
Supplement: s1 [file s1]

**Table S1. Primers for qRT-PCR expression analysis in *V.vinifera* Gamay leaves and cell cultures**

| Name          | ID                    | Sequence (5'-3')             |
|---------------|-----------------------|------------------------------|
| VvMYB14 Fw    | VIT_07s0005g03340     | TCTGAGGCCGGATATCAAAC         |
| VvMYB14 Rev   |                       | GGGACGCATCAAGAGAGTGT         |
| VvWRKY24 Fw   | VIT_08s0058g00690     | ATTCAAGCACTAGTATGAACAGAGCA   |
| VvWRKY24 Rev  |                       | G                            |
| VvSTS36 Fw    | VIT_16s0100g01100     | CCTTGTTGCCTTGGCATGA          |
| VvSTS36 Rv    |                       | CGCCAGGAGATAATCACTGCT        |
| VvSTS29Fw     | VIT_16s0100g01010     | GCACCAGGCATTTCTACACC         |
| VvSTS29Fw     |                       | GGTTTTGGACCAGGCTTGACT        |
| VvPPCK1Fw     | VIT_14s0036g00420.t01 | GAGATAAAATACCTTACTCCTATTCAAC |
| VvPPCK1Rv     |                       | GCCGGAGTGATTTTGTACGTA        |
| VvPPCK2Fw     | VIT_05s0049g00950.t01 | GATTCTCGTCGGAACCTCAA         |
| VvPPCK2Rv     |                       | TACATAATGCTGGCCGGTATC        |
| VvPEPC1Fw     | VIT_12s0028g02180.t01 | CTTTGCTGCCGTTGATACCGA        |
| VvPEPC1Rv     |                       | GCGGCAAGTTTCTACCTTTGGAC      |
| VvPEPC2Fw     | VIT_19s0014g01390.t01 | CTGCGTTCCTCAGACCATTCTCG      |
| VvPEPC2Rv     |                       | GGAGGACTTGAAATGTGTTGACG      |
| VvEF1-alphaFw |                       | CAGCAAAATCACCTTCTTCAACT      |
| VvEF1-alphaRv |                       | GAACTGGGTGCTTGATAGGC         |
|               |                       | AACCAAAATATCCGGAGTAAAAGA     |

**Table S2. Parameters for MS intensity acquisition in MRM mode in an Agilent QqQ instrument.**

| Protein | Peptide sequence    | Charge | Precursor Ion (m/z) | Product Ion (m/z) | Fragment ion | Dwell | Fragmentor | Collision Energy (eV) | Cell Accelerator Voltage | Polarity |
|---------|---------------------|--------|---------------------|-------------------|--------------|-------|------------|-----------------------|--------------------------|----------|
| PEPC    | LADLEAAPAAVAR.heavy | 2+     | 639.358011          | 865.476561        | y9           | 10    | 380        | 20.7                  | 4                        | Positive |
| PEPC    | LADLEAAPAAVAR.heavy | 2+     | 639.358011          | 736.433968        | y8           | 10    | 380        | 20.7                  | 4                        | Positive |
| PEPC    | LADLEAAPAAVAR.heavy | 2+     | 639.358011          | 684.356282        | b7           | 10    | 380        | 20.7                  | 4                        | Positive |
| PEPC    | LADLEAAPAAVAR.heavy | 2+     | 639.358011          | 665.396854        | y7           | 10    | 380        | 20.7                  | 4                        | Positive |
| PEPC    | LADLEAAPAAVAR.heavy | 2+     | 639.358011          | 594.35974         | y6           | 10    | 380        | 20.7                  | 4                        | Positive |
| PEPC    | LADLEAAPAAVAR.light | 2+     | 634.353876          | 855.468292        | y9           | 10    | 380        | 20.7                  | 4                        | Positive |
| PEPC    | LADLEAAPAAVAR.light | 2+     | 634.353876          | 726.425699        | y8           | 10    | 380        | 20.7                  | 4                        | Positive |
| PEPC    | LADLEAAPAAVAR.light | 2+     | 634.353876          | 684.356282        | b7           | 10    | 380        | 20.7                  | 4                        | Positive |
| PEPC    | LADLEAAPAAVAR.light | 2+     | 634.353876          | 655.388585        | y7           | 10    | 380        | 20.7                  | 4                        | Positive |
| PEPC    | LADLEAAPAAVAR.light | 2+     | 634.353876          | 584.351471        | y6           | 10    | 380        | 20.7                  | 4                        | Positive |
| PEPC    | LATPELEYGR.heavy    | 2+     | 579.80508           | 974.482939        | b9           | 10    | 380        | 18.8                  | 4                        | Positive |
| PEPC    | LATPELEYGR.heavy    | 2+     | 579.80508           | 974.481706        | y8           | 10    | 380        | 18.8                  | 4                        | Positive |
| PEPC    | LATPELEYGR.heavy    | 2+     | 579.80508           | 873.434027        | y7           | 10    | 380        | 18.8                  | 4                        | Positive |
| PEPC    | LATPELEYGR.heavy    | 2+     | 579.80508           | 776.381263        | y6           | 10    | 380        | 18.8                  | 4                        | Positive |
| PEPC    | LATPELEYGR.heavy    | 2+     | 579.80508           | 286.176132        | b3           | 10    | 380        | 18.8                  | 4                        | Positive |
| PEPC    | LATPELEYGR.light    | 2+     | 574.800945          | 964.482939        | b9           | 10    | 380        | 18.8                  | 4                        | Positive |
| PEPC    | LATPELEYGR.light    | 2+     | 574.800945          | 964.473437        | y8           | 10    | 380        | 18.8                  | 4                        | Positive |
| PEPC    | LATPELEYGR.light    | 2+     | 574.800945          | 863.425758        | y7           | 10    | 380        | 18.8                  | 4                        | Positive |
| PEPC    | LATPELEYGR.light    | 2+     | 574.800945          | 766.372994        | y6           | 10    | 380        | 18.8                  | 4                        | Positive |
| PEPC    | LATPELEYGR.light    | 2+     | 574.800945          | 286.176132        | b3           | 10    | 380        | 18.8                  | 4                        | Positive |
| PEPC    | MASIDAQLR.heavy     | 2+     | 507.767443          | 812.450012        | y7           | 10    | 380        | 16.6                  | 4                        | Positive |
| PEPC    | MASIDAQLR.heavy     | 2+     | 507.767443          | 725.417983        | y6           | 10    | 380        | 16.6                  | 4                        | Positive |
| PEPC    | MASIDAQLR.heavy     | 2+     | 507.767443          | 612.333919        | y5           | 10    | 380        | 16.6                  | 4                        | Positive |
| PEPC    | MASIDAQLR.light     | 2+     | 502.763309          | 802.441743        | y7           | 10    | 380        | 16.6                  | 4                        | Positive |
| PEPC    | MASIDAQLR.light     | 2+     | 502.763309          | 715.409714        | y6           | 10    | 380        | 16.6                  | 4                        | Positive |
| PEPC    | MASIDAQLR.light     | 2+     | 502.763309          | 602.32565         | y5           | 10    | 380        | 16.6                  | 4                        | Positive |
